# Supplementary material for: Implementation of Epigenetic Variation in Sorghum Selection and Implications for Crop Resilience Breeding
Source: PubMed Central journal article supplement (PMC8828589; doi:10.3389/fpls.2021.798243), 2022-01-27

**a**

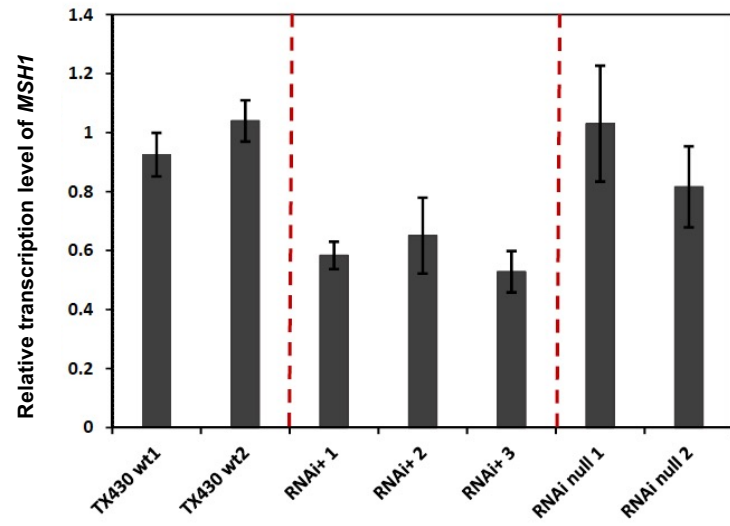

**b**

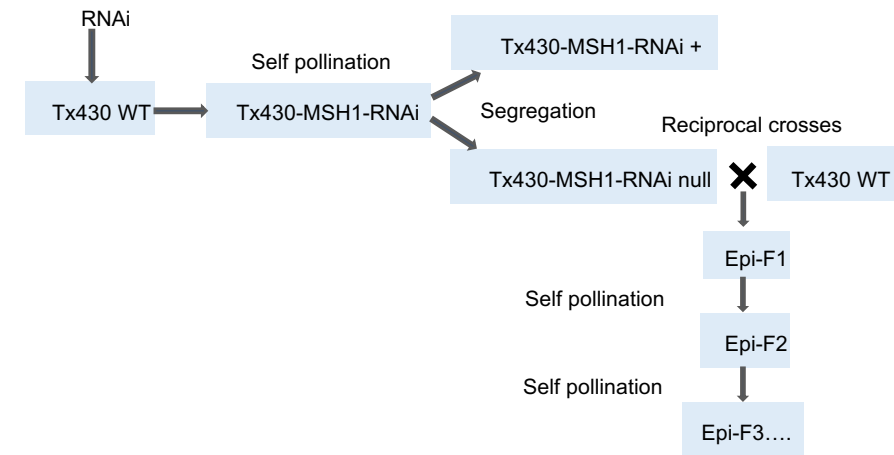

### Havelock

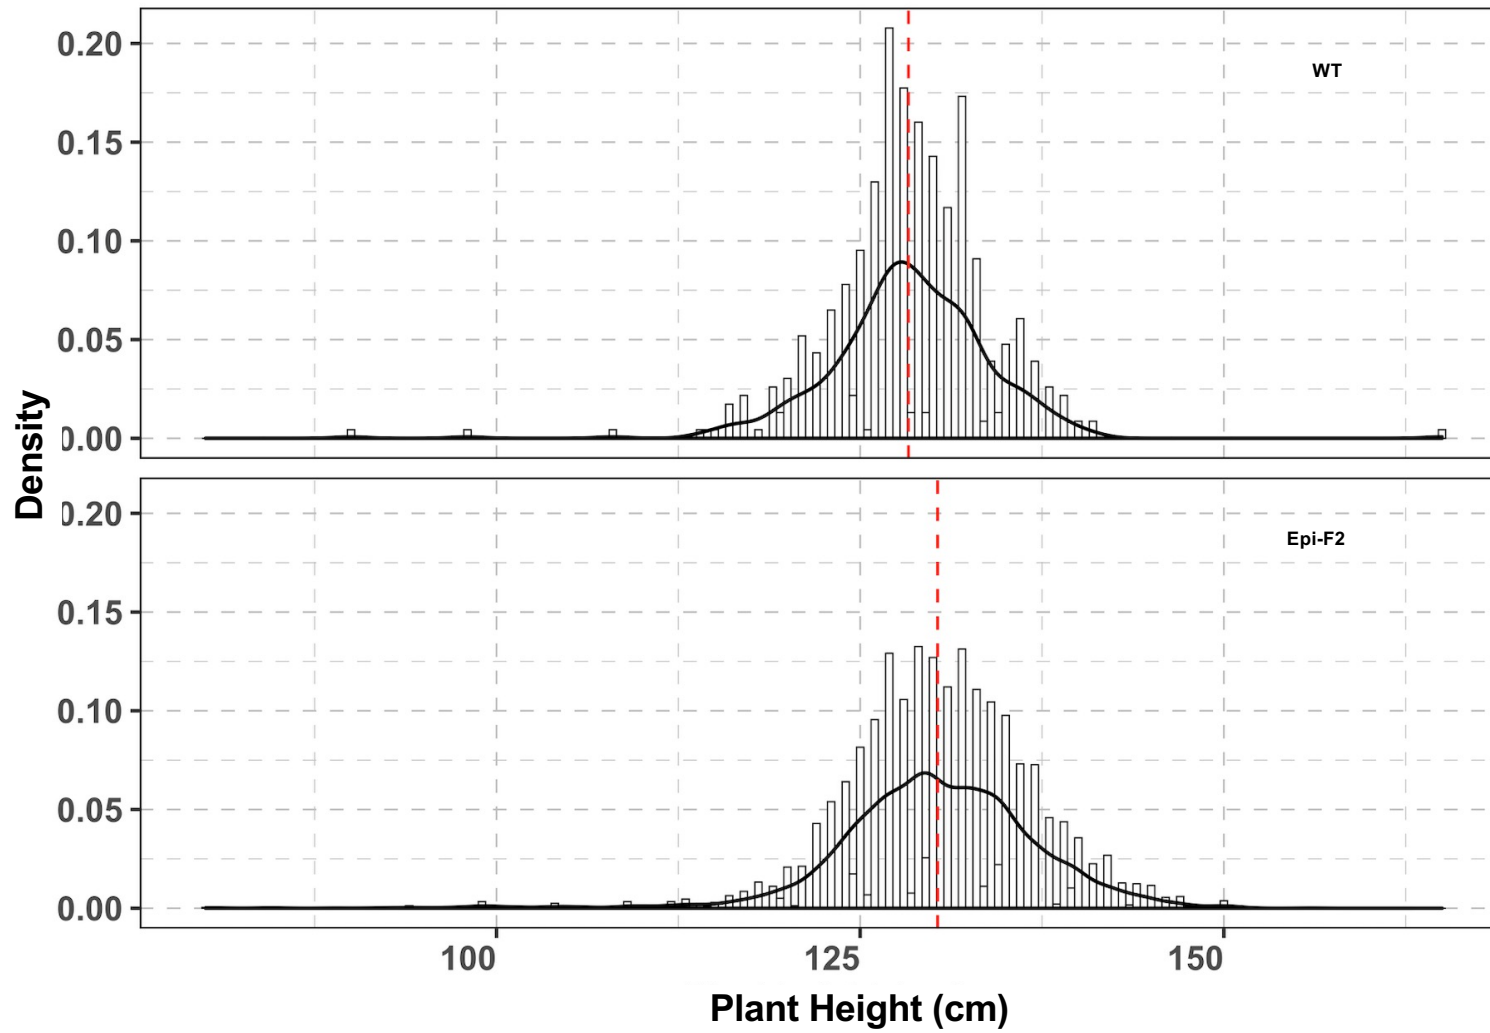

### Havelock

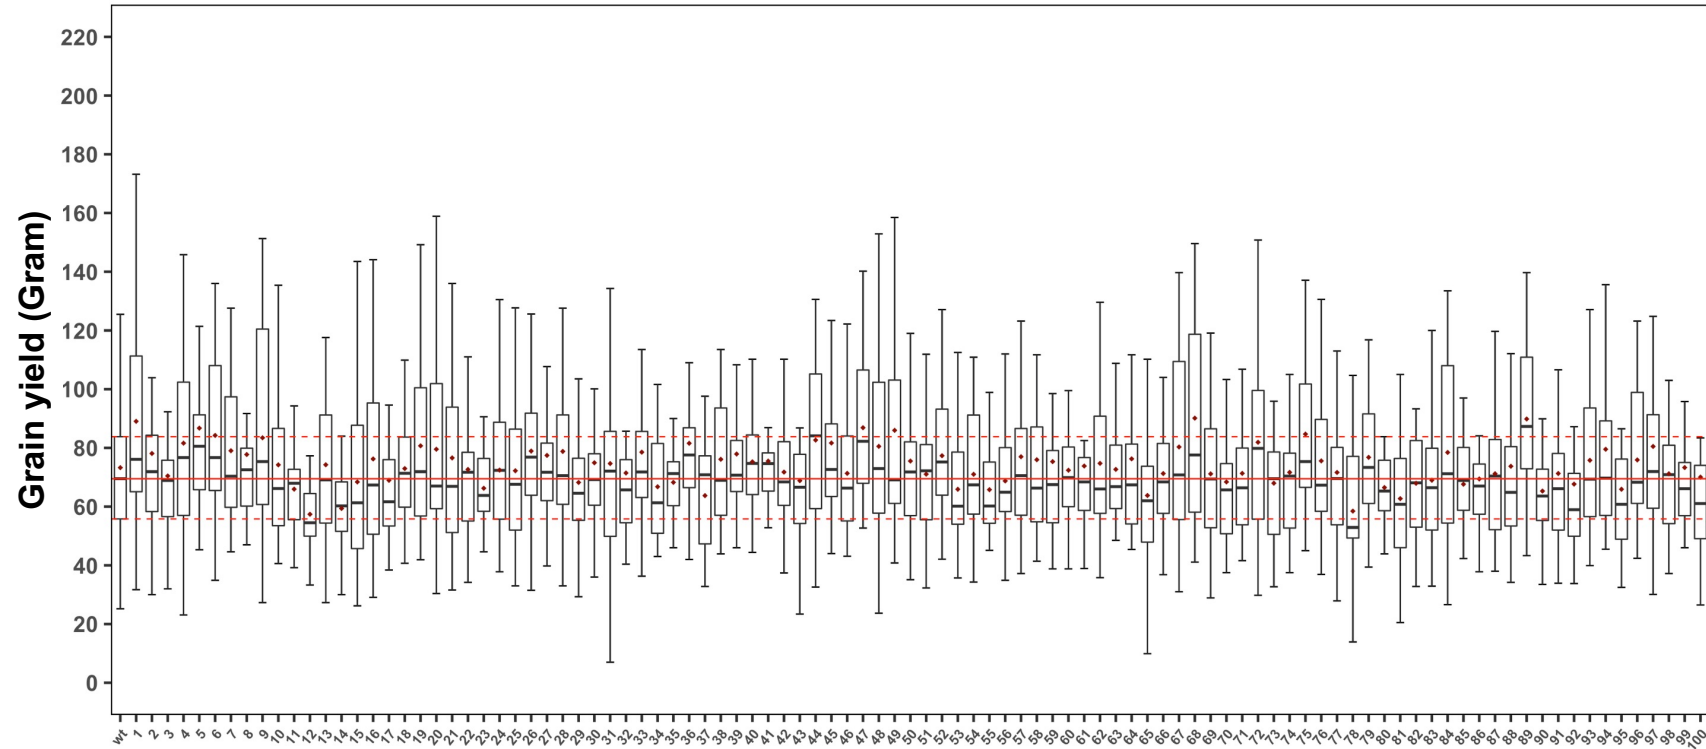

Supporting figure 4

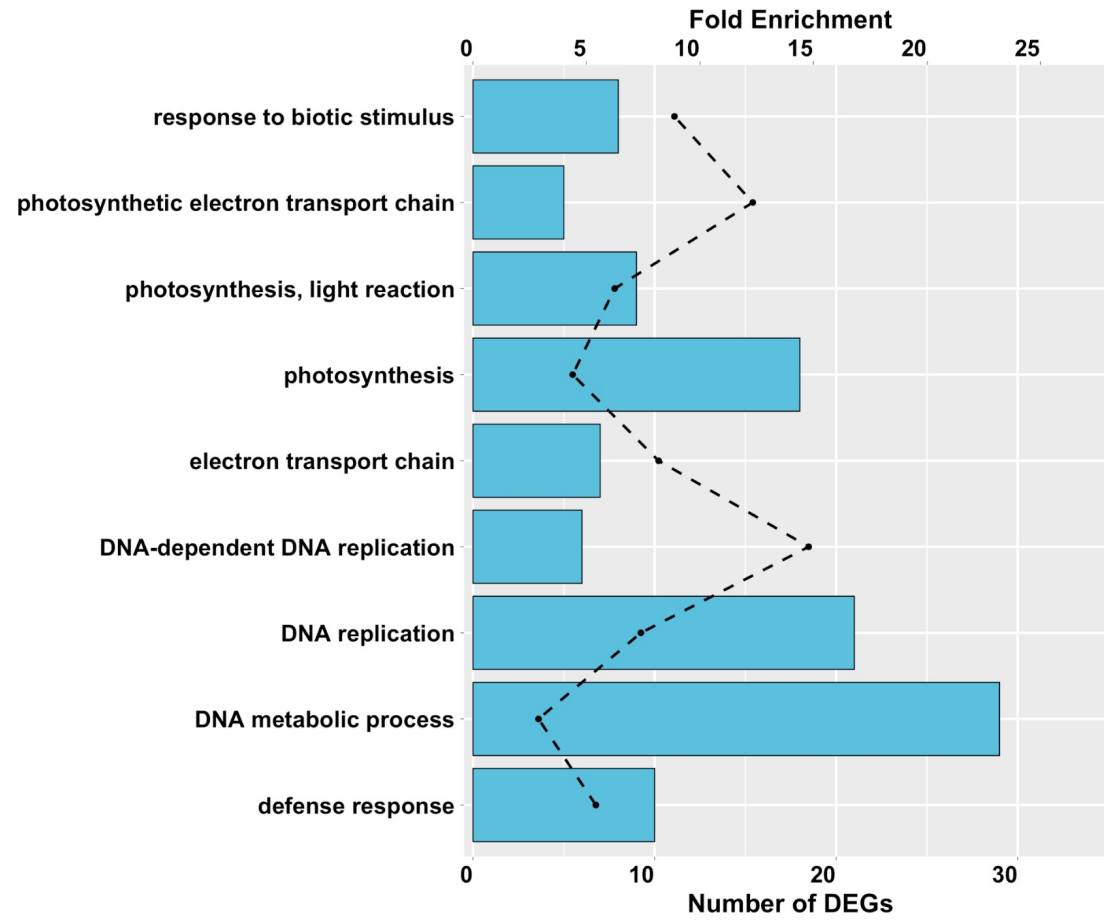

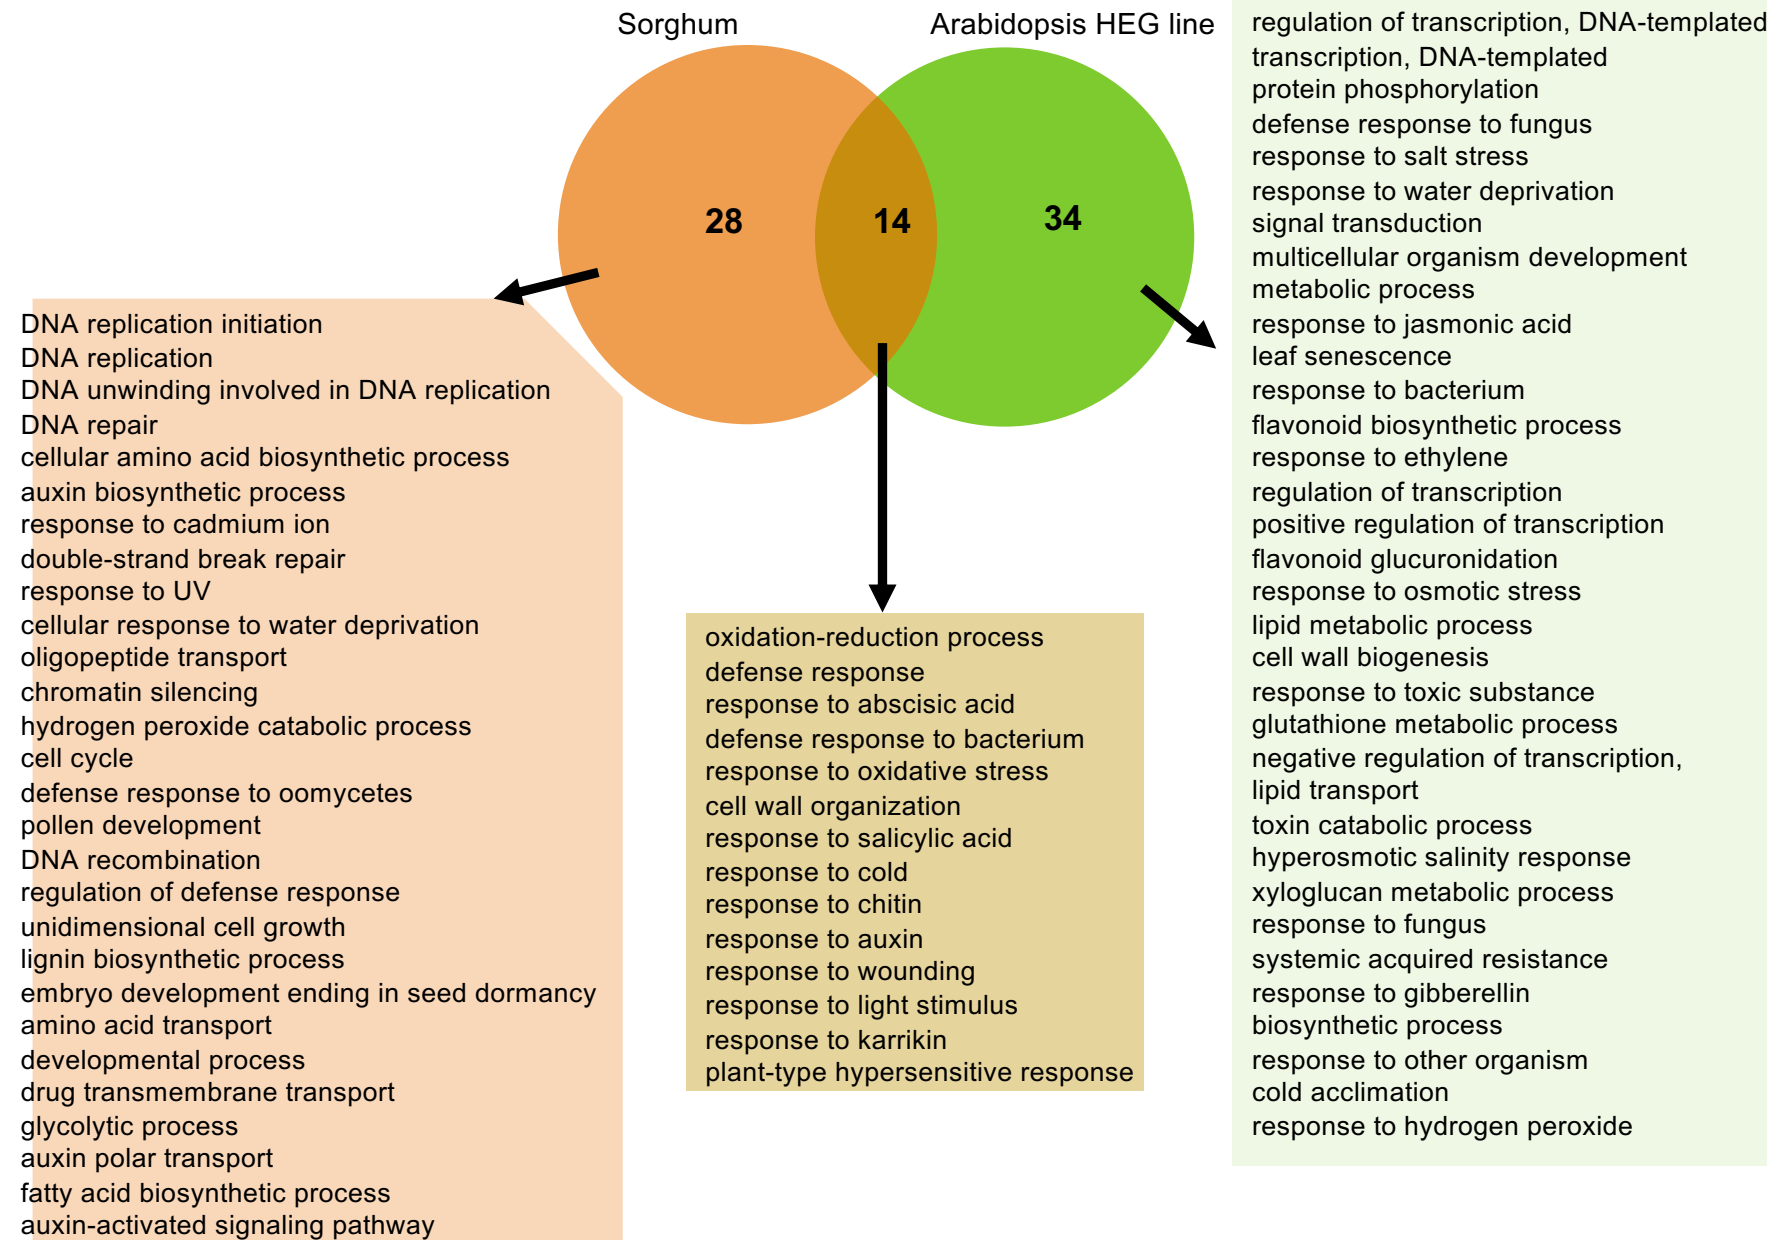

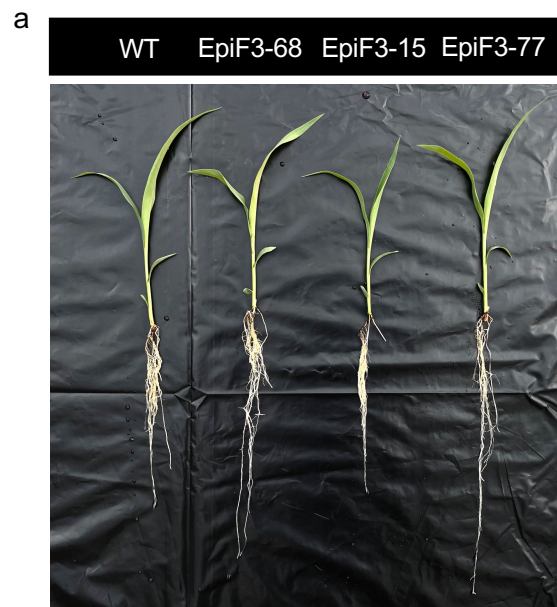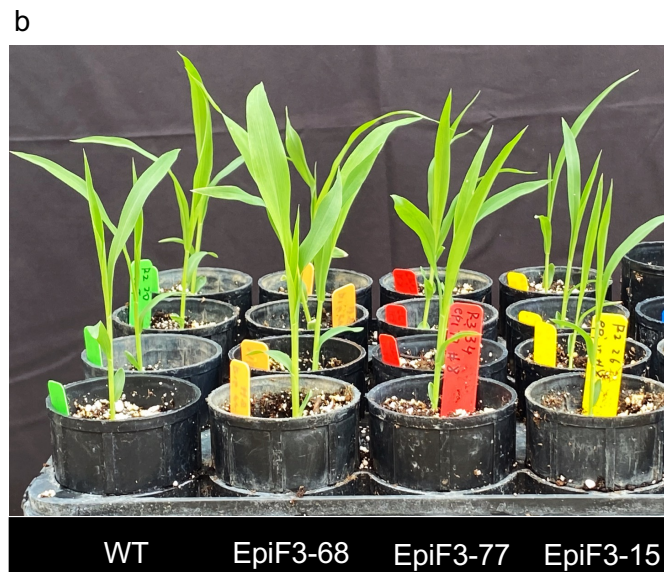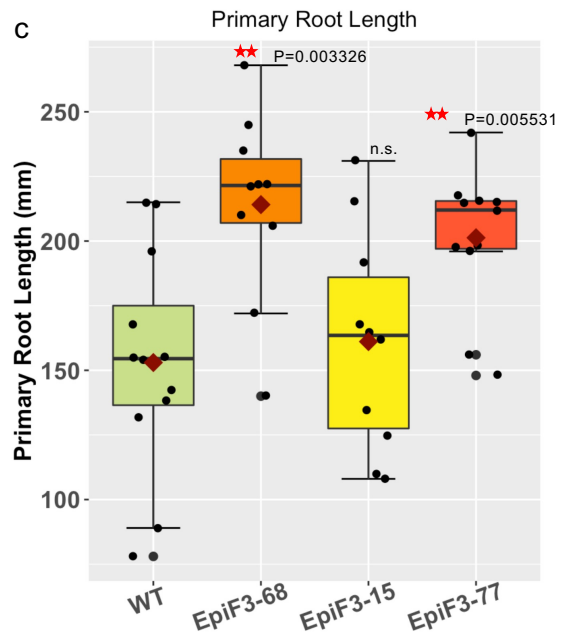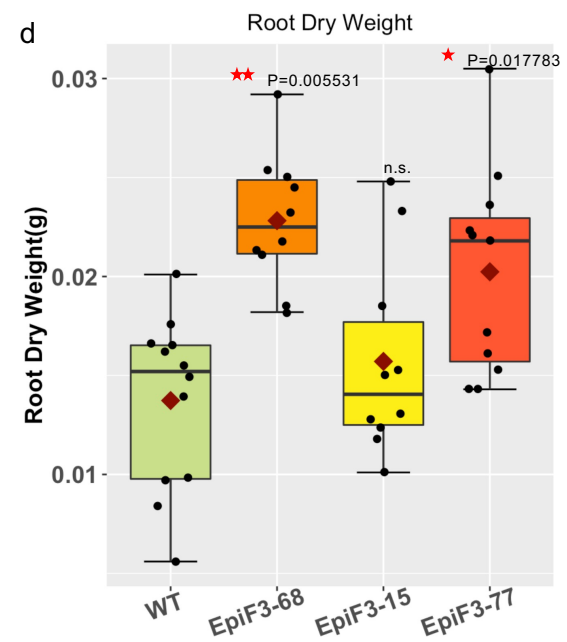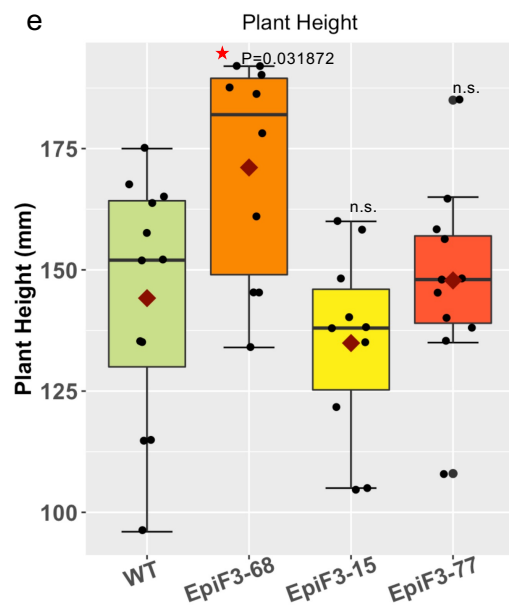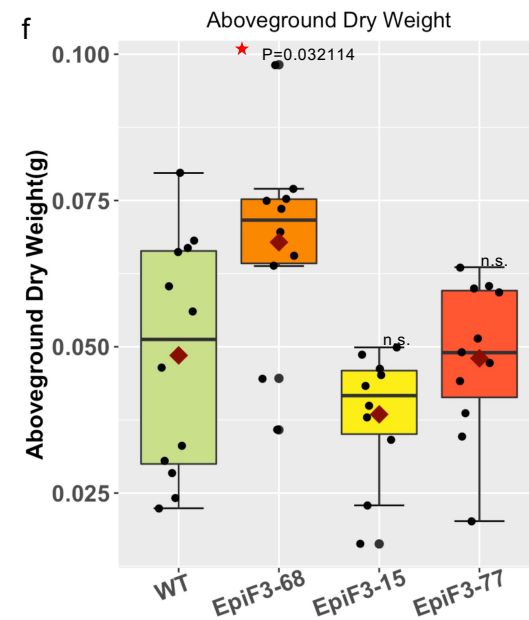

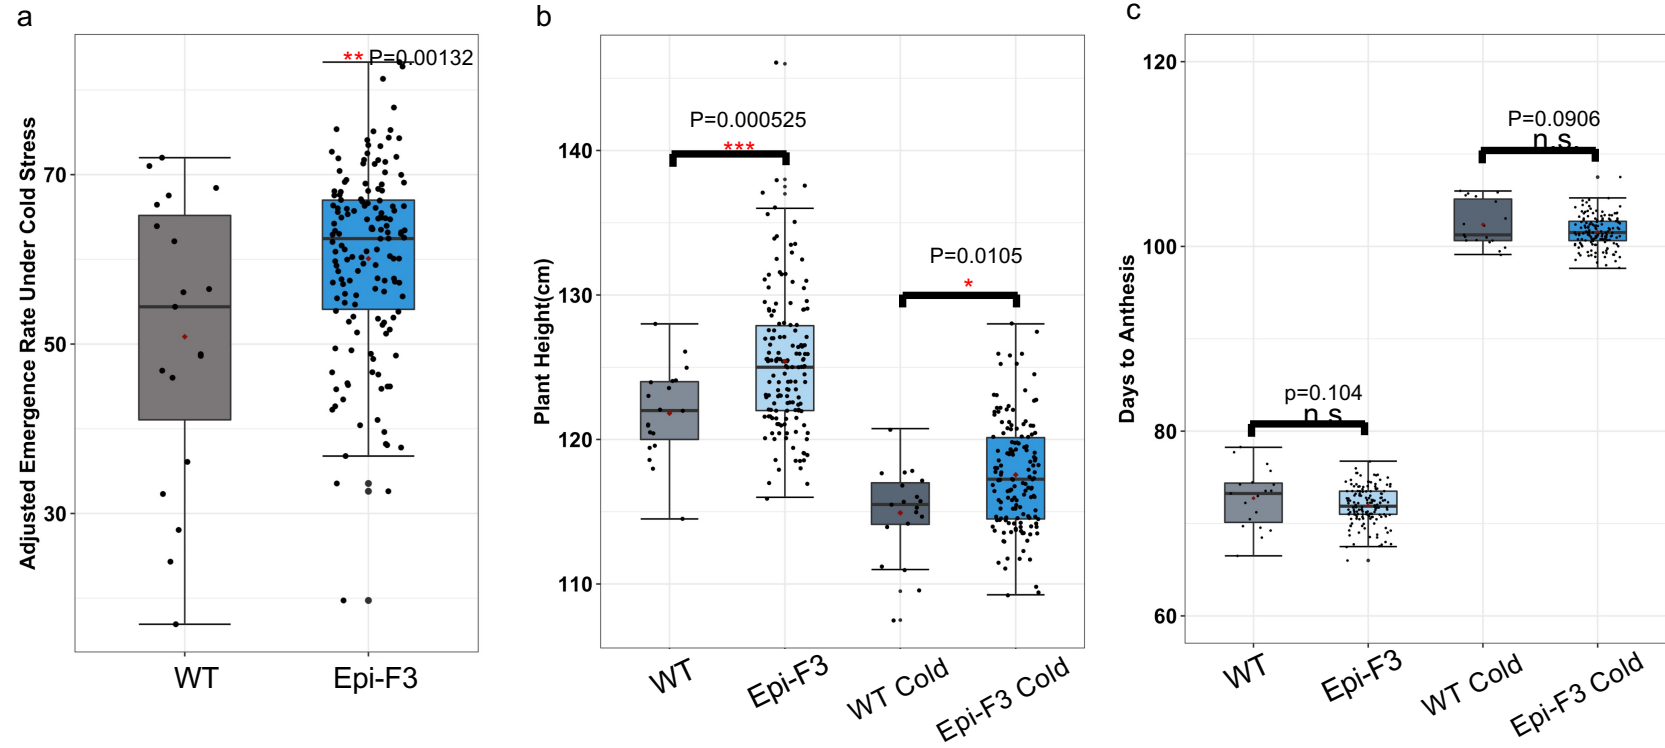

Supporting figure 8

a

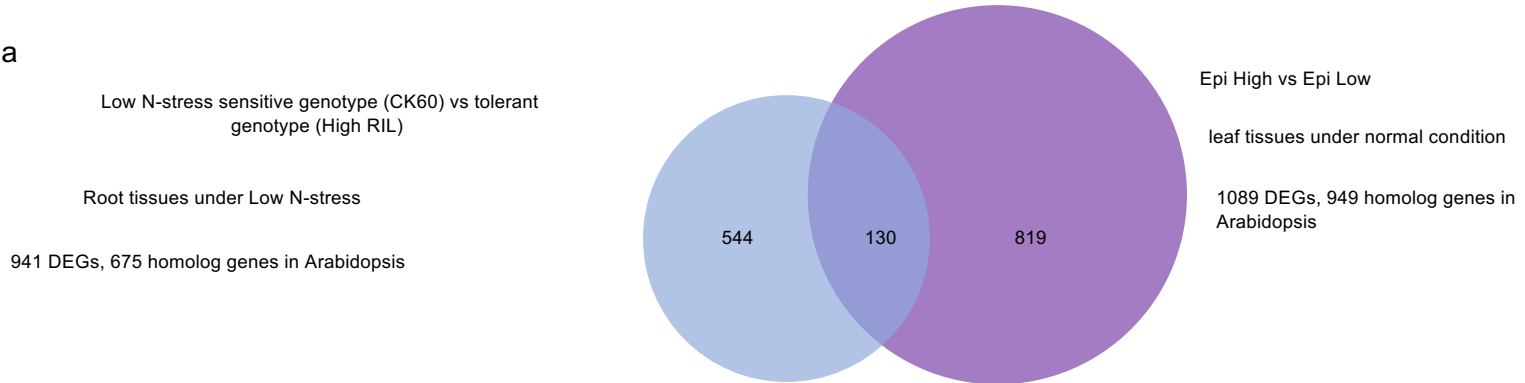

b

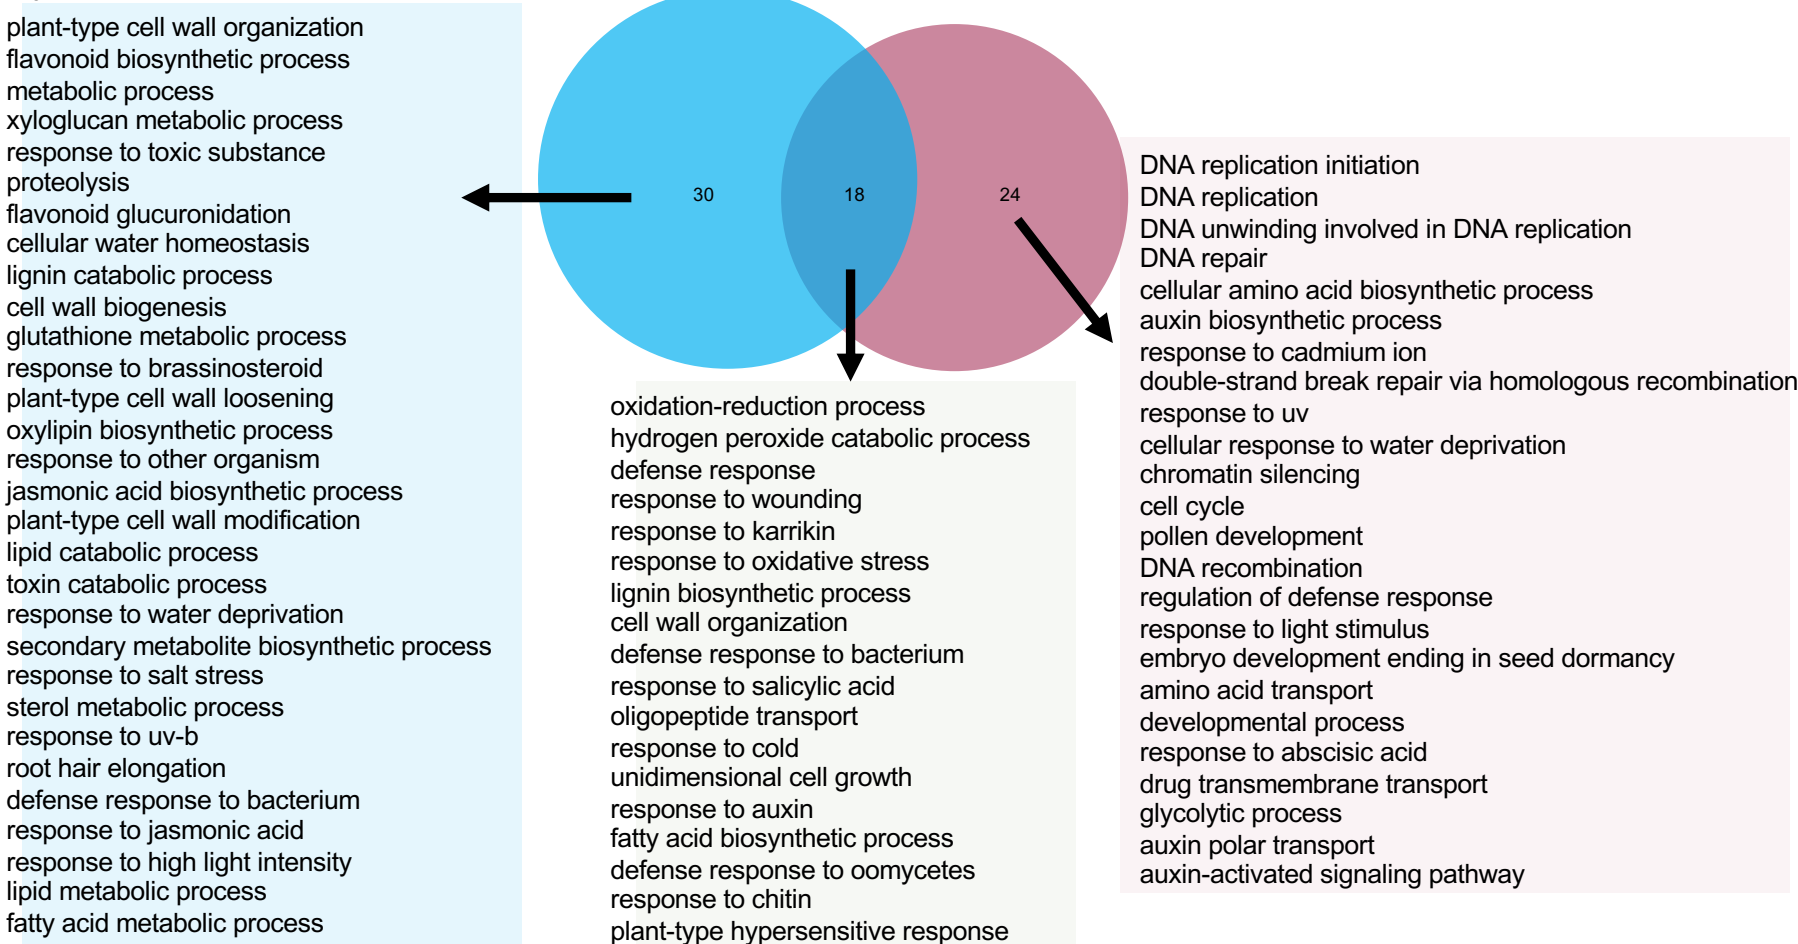

Supplement: Data_Sheet_1.pdf [file Data_Sheet_1.pdf]
