# Supplementary material for: Implementation of Epigenetic Variation in Sorghum Selection and Implications for Crop Resilience Breeding
Source: Front Plant Sci. 2022 Jan 27;12:798243. doi: 10.3389/fpls.2021.798243 (PMC8828589; doi:10.3389/fpls.2021.798243)
Supplement: Supplementary file 6 [file Table_5.XLSX]

## Sheet: Supplemental table 5. Enriched 
Category	Term	Count	Fold Enrichment	%	PValue	Genes	List Total	Pop Hits	Pop Total	Bonferroni	Benjamini	FDR
GOTERM_BP_DIRECT	GO:0006270~DNA replication initiation	17	16.7278	1.86608	6.61e-17	AT1G44900, AT4G29910, AT2G29680, AT3G25100, AT1G67630, AT5G46280, AT4G02060, AT5G49010, AT5G67100, AT2G16440, AT2G14050, AT1G67180, AT1G26840, AT2G20980, AT5G44635, AT4G16970, AT2G07690	752	25	18499	1.15e-13	6.86e-14	6.82e-14
GOTERM_BP_DIRECT	GO:0006260~DNA replication	19	5.49876	2.08562	6.87e-09	AT1G08260, AT4G29910, AT2G29680, AT3G28730, AT5G52950, AT5G41880, AT5G49010, AT1G65470, AT1G50840, AT2G31270, AT2G14050, AT1G26840, AT5G08020, AT1G27880, AT1G08840, AT1G60930, AT2G40550, AT2G24490, AT3G27060	752	85	18499	7.12e-06	3.56e-06	3.54e-06
GOTERM_BP_DIRECT	GO:0006268~DNA unwinding involved in DNA replication	7	12.2999	0.768386	9.96e-06	AT1G44900, AT3G10690, AT5G46280, AT4G02060, AT5G44635, AT2G16440, AT2G07690	752	14	18499	0.0102782	0.00344379	0.00342386
GOTERM_BP_DIRECT	GO:0055114~oxidation-reduction process	86	1.59066	9.44018	1.96e-05	AT2G26170, AT3G58610, AT1G08570, AT1G05260, AT1G15140, AT3G26300, AT3G18080, AT4G37320, AT2G43020, AT5G05580, AT5G60600, AT5G53460, AT3G15360, AT3G61220, AT1G70670, AT5G05340, AT4G11290, AT1G61720, AT4G19170, AT3G48280, AT3G02580, AT4G24220, AT3G04120, AT5G21100, AT5G25620, AT5G24530, AT3G52880, AT3G27820, AT3G20790, AT5G25140, AT1G47290, AT4G39950, AT5G05390, AT5G59530, AT1G71695, AT5G04140, AT1…	752	1330	18499	0.0200915	0.00507398	0.00504462
GOTERM_BP_DIRECT	GO:0009611~response to wounding	22	2.71957	2.41493	6.24e-05	AT4G24220, AT3G54420, AT3G25250, AT2G30490, AT1G78080, AT5G50200, AT1G55020, AT3G24550, AT2G28290, AT3G21240, AT1G32640, AT5G24090, AT5G13930, AT3G61060, AT1G05800, AT2G47800, AT1G74950, AT4G34190, AT2G46370, AT1G76680, AT1G80840, AT1G20510	752	199	18499	0.0626294	0.0129349	0.0128601
GOTERM_BP_DIRECT	GO:0006281~DNA repair	20	2.53606	2.19539	0.00036	AT1G08260, AT4G21070, AT3G28730, AT5G43530, AT4G31400, AT2G17930, AT4G25290, AT5G49110, AT1G50840, AT2G14050, AT5G08020, AT5G57970, AT1G50030, AT5G64520, AT1G04020, AT5G50780, AT2G02760, AT2G24490, AT3G52115, AT3G27060	752	194	18499	0.311837	0.062277	0.0619166
GOTERM_BP_DIRECT	GO:0008652~cellular amino acid biosynthetic process	11	3.9217	1.20746	0.000445	AT1G75500, AT2G45300, AT5G53460, AT1G07780, AT5G04140, AT3G58610, AT4G02610, AT3G59760, AT2G37250, AT4G35640, AT1G22410	752	69	18499	0.37002	0.0659948	0.065613
GOTERM_BP_DIRECT	GO:0009851~auxin biosynthetic process	8	5.31886	0.878156	0.000627	AT1G04610, AT1G75500, AT5G25620, AT4G02610, AT1G48910, AT4G05160, AT3G43600, AT5G66350	752	37	18499	0.478249	0.0812951	0.0808247
GOTERM_BP_DIRECT	GO:0046686~response to cadmium ion	27	1.94208	2.96378	0.00168848	AT3G58610, AT2G36530, AT3G19170, AT1G48000, AT1G67070, AT5G35630, AT2G41380, AT5G53460, AT5G19380, AT5G20720, AT3G60190, AT3G04120, AT1G62740, AT1G56340, AT3G52880, AT1G63770, AT2G33590, AT5G65140, AT5G60390, AT2G44060, AT2G05710, AT2G45290, AT5G42740, AT3G08590, AT1G76680, AT3G12500, AT5G02500	752	342	18499	0.826649	0.19455	0.193425
GOTERM_BP_DIRECT	GO:0000724~double-strand break repair via homologous recombination	9	3.88417	0.987925	0.00201943	AT3G05740, AT4G21070, AT5G47870, AT4G31400, AT5G64520, AT5G64630, AT1G60930, AT1G04020, AT1G65470	752	57	18499	0.877086	0.209415	0.208204
GOTERM_BP_DIRECT	GO:0009411~response to UV	6	5.46661	0.658617	0.0041756	AT3G24495, AT5G07990, AT3G21240, AT5G37890, AT4G02070, AT3G50930	752	27	18499	0.986953	0.309292	0.307503
GOTERM_BP_DIRECT	GO:0042631~cellular response to water deprivation	6	5.46661	0.658617	0.0041756	AT3G05740, AT1G64660, AT1G27880, AT1G68010, AT3G03740, AT5G24090	752	27	18499	0.986953	0.309292	0.307503
GOTERM_BP_DIRECT	GO:0009409~response to cold	23	1.89229	2.5247	0.00542321	AT4G17090, AT1G78080, AT3G03050, AT5G40010, AT1G05260, AT1G68530, AT3G17390, AT4G35090, AT3G22840, AT2G36530, AT3G57260, AT5G24090, AT5G16910, AT2G37770, AT5G57560, AT4G13850, AT5G54770, AT1G50460, AT5G37770, AT2G03440, AT5G20720, AT5G02500, AT1G56070	752	299	18499	0.996444	0.341333	0.339358
GOTERM_BP_DIRECT	GO:0006857~oligopeptide transport	9	3.30444	0.987925	0.00559561	AT1G65730, AT1G32450, AT2G37900, AT5G64410, AT1G59740, AT3G16180, AT1G22540, AT2G02040, AT1G68570	752	67	18499	0.997029	0.341333	0.339358
GOTERM_BP_DIRECT	GO:0006342~chromatin silencing	6	4.76124	0.658617	0.00769078	AT2G27040, AT1G69770, AT3G54560, AT5G02560, AT1G54690, AT4G27230	752	31	18499	0.999667	0.423787	0.421335
GOTERM_BP_DIRECT	GO:0042742~defense response to bacterium	21	1.87172	2.30516	0.00910252	AT3G56400, AT4G31800, AT5G46330, AT1G73805, AT5G24400, AT5G66190, AT5G22570, AT5G24530, AT3G54560, AT4G23180, AT3G04720, AT4G39950, AT5G64810, AT1G77920, AT1G19250, AT2G39050, AT3G53810, AT4G31750, AT1G80840, AT2G25110, AT5G02500	752	276	18499	0.999924	0.436698	0.434171
GOTERM_BP_DIRECT	GO:0042744~hydrogen peroxide catabolic process	10	2.76402	1.09769	0.0100415	AT5G19890, AT2G22420, AT1G71695, AT1G05260, AT3G52880, AT5G05340, AT4G35090, AT3G27820, AT4G11290, AT4G35000	752	89	18499	0.999972	0.436698	0.434171
GOTERM_BP_DIRECT	GO:0009626~plant-type hypersensitive response	9	2.99186	0.987925	0.0101068	AT3G54420, AT4G20380, AT1G73805, AT1G19250, AT3G46530, AT3G07040, AT5G15410, AT3G50930, AT3G12500	752	74	18499	0.999973	0.436698	0.434171
GOTERM_BP_DIRECT	GO:0007049~cell cycle	12	2.41965	1.31723	0.0108595	AT3G12280, AT1G44900, AT5G22110, AT5G46280, AT4G02060, AT5G44635, AT4G02570, AT2G16440, AT2G31270, AT5G43080, AT2G07690, AT3G60190	752	122	18499	0.999988	0.450451	0.447845
GOTERM_BP_DIRECT	GO:0002229~defense response to oomycetes	6	4.34113	0.658617	0.0114004	AT4G39950, AT1G15520, AT5G24400, AT1G73805, AT5G24530, AT5G19380	752	34	18499	0.999993	0.454702	0.452071
GOTERM_BP_DIRECT	GO:0009555~pollen development	16	2.03936	1.75631	0.0123634	AT2G30490, AT2G36850, AT2G37950, AT5G23670, AT3G54650, AT1G65470, AT3G12280, AT1G26840, AT1G18370, AT5G64630, AT3G18000, AT3G53810, AT3G08590, AT5G56270, AT2G07050, AT1G74260	752	193	18499	0.999998	0.467135	0.464432
GOTERM_BP_DIRECT	GO:0006310~DNA recombination	7	3.58746	0.768386	0.0126131	AT4G21070, AT5G08020, AT1G27880, AT5G64630, AT1G60930, AT2G24490, AT1G65470	752	48	18499	0.999998	0.467135	0.464432
GOTERM_BP_DIRECT	GO:0031347~regulation of defense response	8	3.02766	0.878156	0.0159828	AT4G31800, AT3G56400, AT1G74950, AT4G03500, AT2G40750, AT1G03670, AT1G80840, AT4G03460	752	65	18499	1	0.552471	0.549275
GOTERM_BP_DIRECT	GO:0009826~unidimensional cell growth	11	2.37366	1.20746	0.0176131	AT1G21270, AT1G75500, AT3G18000, AT1G68530, AT5G54510, AT4G22970, AT1G79250, AT1G54490, AT3G23090, AT2G20370, AT2G45110	752	114	18499	1	0.570775	0.567473
GOTERM_BP_DIRECT	GO:0009809~lignin biosynthetic process	8	2.89409	0.878156	0.0200719	AT1G72680, AT5G48930, AT5G05340, AT4G01070, AT3G17390, AT2G40890, AT2G33590, AT5G54160	752	68	18499	1	0.62059	0.616999
GOTERM_BP_DIRECT	GO:0009416~response to light stimulus	15	1.96274	1.64654	0.0213836	AT2G30490, AT2G34430, AT5G25830, AT1G78080, AT1G68530, AT2G17730, AT4G35090, AT5G64330, AT2G36530, AT2G37770, AT5G57660, AT5G04140, AT2G29120, AT4G32890, AT2G29100	752	188	18499	1	0.62059	0.616999
GOTERM_BP_DIRECT	GO:0009793~embryo development ending in seed dormancy	29	1.55423	3.18332	0.021469	AT1G11680, AT1G44900, AT1G13120, AT3G52590, AT5G24400, AT4G31400, AT3G54650, AT1G55540, AT4G22970, AT5G42390, AT3G48740, AT1G08840, AT2G04030, AT4G37300, AT2G28880, AT5G48600, AT1G08260, AT5G40480, AT1G67730, AT3G57870, AT5G23660, AT1G71830, AT4G02570, AT5G13710, AT1G48175, AT1G50030, AT2G44060, AT1G48410, AT2G46140	752	459	18499	1	0.62059	0.616999
GOTERM_BP_DIRECT	GO:0009751~response to salicylic acid	13	2.0632	1.427	0.0242852	AT3G56400, AT4G31800, AT2G37710, AT1G15520, AT5G24530, AT1G28480, AT1G48000, AT1G21270, AT1G76680, AT3G46130, AT2G40750, AT1G80840, AT2G29420	752	155	18499	1	0.662731	0.658897
GOTERM_BP_DIRECT	GO:0009733~response to auxin	20	1.69653	2.19539	0.0280127	AT5G24520, AT1G56150, AT2G36910, AT5G54510, AT4G02570, AT5G13930, AT5G57560, AT1G29500, AT1G50030, AT1G48410, AT5G01490, AT5G07990, AT5G37020, AT5G43700, AT1G04250, AT2G46370, AT5G37770, AT2G02560, AT3G16500, AT4G32880	752	290	18499	1	0.74485	0.74054
GOTERM_BP_DIRECT	GO:0006952~defense response	37	1.38327	4.06147	0.0443084	AT4G21380, AT3G25250, AT1G11340, AT2G34930, AT4G02600, AT1G55020, AT2G28290, AT1G58410, AT1G02170, AT5G15410, AT3G14470, AT2G45760, AT1G47890, AT1G75500, AT1G74950, AT3G61220, AT5G42510, AT2G03440, AT3G54420, AT1G14320, AT1G22900, AT2G14610, AT4G05200, AT1G64060, AT3G57270, AT4G39950, AT2G42260, AT3G46710, AT4G37050, AT3G14460, AT3G46530, AT3G07040, AT5G50780, AT1G77330, AT5G01750, AT1G58170, AT4…	752	658	18499	1	1	0.995174
GOTERM_BP_DIRECT	GO:0010200~response to chitin	11	2.03456	1.20746	0.0445255	AT4G31800, AT3G56400, AT4G33050, AT2G46400, AT5G56960, AT5G27420, AT1G75490, AT1G32640, AT5G46910, AT5G64660, AT1G80840	752	133	18499	1	1	0.995174
GOTERM_BP_DIRECT	GO:0006865~amino acid transport	6	3.01221	0.658617	0.0477395	AT2G24762, AT5G15240, AT5G57685, AT5G09220, AT5G40780, AT2G21050	752	49	18499	1	1	0.995174
GOTERM_BP_DIRECT	GO:0032502~developmental process	7	2.60906	0.768386	0.0509826	AT5G07120, AT2G30490, AT1G14320, AT2G34620, AT4G38160, AT1G21150, AT3G13960	752	66	18499	1	1	0.995174
GOTERM_BP_DIRECT	GO:0009737~response to abscisic acid	24	1.49846	2.63447	0.0523572	AT5G25610, AT3G50980, AT3G57870, AT1G55020, AT5G40010, AT1G05470, AT5G27420, AT1G32640, AT3G22850, AT2G33590, AT2G36530, AT3G02850, AT1G48000, AT5G57330, AT2G37170, AT2G17290, AT4G37050, AT2G05710, AT1G70670, AT5G42950, AT2G46270, AT5G02310, AT5G45820, AT5G37770	752	394	18499	1	1	0.995174
GOTERM_BP_DIRECT	GO:0006855~drug transmembrane transport	7	2.45997	0.768386	0.0644159	AT1G15520, AT4G23030, AT2G47800, AT1G33110, AT2G37280, AT3G21690, AT3G53480	752	70	18499	1	1	0.995174
GOTERM_BP_DIRECT	GO:0006096~glycolytic process	7	2.42533	0.768386	0.0680691	AT3G04120, AT1G50460, AT5G42740, AT3G25860, AT3G08590, AT4G29130, AT2G36530	752	71	18499	1	1	0.995174
GOTERM_BP_DIRECT	GO:0009926~auxin polar transport	6	2.63569	0.658617	0.0762488	AT5G13930, AT2G26170, AT1G29500, AT4G33090, AT2G36910, AT3G53480	752	56	18499	1	1	0.995174
GOTERM_BP_DIRECT	GO:0006633~fatty acid biosynthetic process	10	1.92185	1.09769	0.0767257	AT3G02580, AT5G05580, AT1G55020, AT1G68530, AT1G08510, AT1G54580, AT1G14290, AT1G76680, AT4G05160, AT3G22400	752	128	18499	1	1	0.995174
GOTERM_BP_DIRECT	GO:0080167~response to karrikin	10	1.92185	1.09769	0.0767257	AT2G30490, AT1G10370, AT5G05270, AT5G63810, AT5G40780, AT3G61220, AT5G64410, AT3G02910, AT3G11600, AT3G22840	752	128	18499	1	1	0.995174
GOTERM_BP_DIRECT	GO:0006979~response to oxidative stress	18	1.52163	1.97585	0.0854096	AT5G19890, AT3G04120, AT3G25250, AT1G56340, AT1G05260, AT4G35090, AT5G13930, AT2G22420, AT1G71695, AT5G37980, AT3G15360, AT2G05710, AT5G60640, AT5G05340, AT4G37900, AT4G11290, AT1G72060, AT4G35000	752	291	18499	1	1	0.995174
GOTERM_BP_DIRECT	GO:0009734~auxin-activated signaling pathway	13	1.68314	1.427	0.0868832	AT1G56150, AT2G36910, AT5G54510, AT4G02570, AT5G66350, AT1G75500, AT1G29500, AT5G37020, AT4G37900, AT5G43700, AT1G04250, AT3G16500, AT2G21050	752	190	18499	1	1	0.995174
GOTERM_BP_DIRECT	GO:0071555~cell wall organization	19	1.48852	2.08562	0.0899075	AT1G32170, AT2G32990, AT2G36850, AT1G12780, AT3G03050, AT2G38540, AT2G15460, AT5G16910, AT2G37090, AT5G57560, AT1G75500, AT2G46930, AT1G27440, AT1G19360, AT1G78570, AT2G03220, AT4G31590, AT2G45110, AT4G33330	752	314	18499	1	1	0.995174
